# Supplementary material for: Lanthanide dodecyl sulfates, a potent family of catalysts for the preparation of biobased epoxy thermosets
Source: Royal Society of Chemistry journal article supplement (doi:10.1039/d1cc00808k), 2021-01-01
Supplement: d1cc00808k1.pdf [file d1cc00808k1.pdf]

## Electronic Supplementary Information

### **Lanthanide dodecyl sulfates, a potent family of catalysts for the preparation of biobased epoxy thermosets**

Forouzan Kazemi, Louis Schutz, Jean-Yves Bergeron, Eric Gagnon, Glenn Yap and Jerome P. Claverie\*

#### **List of Figures**

|                                                                                                                                                                                     |    |
|-------------------------------------------------------------------------------------------------------------------------------------------------------------------------------------|----|
| Figure S1 A. gel-time measurement setup. B. Various solid LDO-PEI formulations. C. Various solid BADGE-Epikure formulations.....                                                    | 4  |
| Figure S2 XPS – Survey mode for La(DS) <sub>x</sub> catalyst.....                                                                                                                   | 7  |
| Figure S3 : XPS – Survey mode for Ce(DS) <sub>x</sub> catalyst.....                                                                                                                 | 8  |
| Figure S4 : XPS – Survey mode for Pr(DS) <sub>x</sub> catalyst.....                                                                                                                 | 9  |
| Figure S5 : XPS – Survey mode for Sm(DS) <sub>x</sub> catalyst.....                                                                                                                 | 10 |
| Figure S6 : XPS – Survey mode for Eu(DS) <sub>x</sub> catalyst.....                                                                                                                 | 11 |
| Figure S7 : XPS – Survey mode for Gd(DS) <sub>x</sub> catalyst.....                                                                                                                 | 12 |
| Figure S8 : XPS – Survey mode for Tb(DS) <sub>x</sub> catalyst.....                                                                                                                 | 13 |
| Figure S9 : XPS – Survey mode for Tm(DS) <sub>x</sub> catalyst.....                                                                                                                 | 14 |
| Figure S10 : XPS – Survey mode for Yb(DS) <sub>x</sub> catalyst.....                                                                                                                | 15 |
| Figure S11 : XPS – Survey mode for Lu(DS) <sub>x</sub> catalyst.....                                                                                                                | 16 |
| Figure S12 : <sup>1</sup> H NMR (400MHz, DMSO-d <sub>6</sub> ) of La(DS) <sub>x</sub> and benzene as internal standard.....                                                         | 17 |
| Figure S13 Environment of the La atom in the crystal cell and corresponding bond distances.....                                                                                     | 20 |
| Figure S14 ORTEP diagram of NaLa(DS) <sub>4</sub> (H <sub>2</sub> O) <sub>2</sub> .....                                                                                             | 21 |
| Figure S15 Inverse of the gel time vs La(DS) <sub>x</sub> catalyst concentration (equimolar formulation of Epikure 3251 and BADGE).....                                             | 24 |
| Figure S16 Experimental and fitted curve dx/dt vs conversion (x) at 173°C, 188 °C and 203 °C (LDO:PEI = 60:40 wt%, no catalyst).....                                                | 26 |
| Figure S17 Experimental and fitted curve dx/dt vs conversion (x) at 109°C, 139 °C and 169 °C (LDO:PEI = 60:40 wt%, 2 wt% of La(DS) <sub>x</sub> ).....                              | 26 |
| Figure S18 Experimental and fitted curve dx/dt vs conversion (x) at 109°C, 139 °C and 169 °C (LDO:PEI = 60:40 wt%, 2 wt% of Pr(DS) <sub>x</sub> ).....                              | 27 |
| Figure S19 Experimental and fitted curve dx/dt vs conversion (x) at 109°C, 139 °C and 169 °C (LDO:PEI = 60:40 wt%, 2 wt% of Gd(DS) <sub>x</sub> ).....                              | 27 |
| Figure S20 Experimental and fitted curve dx/dt vs conversion (x) at 109°C, 139 °C and 169 °C (LDO:PEI = 60:40 wt%, 2 wt% of Eu(DS) <sub>x</sub> ).....                              | 28 |
| Figure S21 Calculated vibrations for NaSO <sub>4</sub> CH <sub>3</sub> at 1076 cm <sup>-1</sup> and 1225 cm <sup>-1</sup> (the vectors indicate the direction of displacement)..... | 33 |
| Figure S22 <sup>13</sup> C Solid-state NMR of epoxy polymer prepared with (top) and without (bottom) catalyst (see Table S2 for amounts of each components).....                    | 35 |

## List of Tables

|                                                                                                                                                                                                                                                                                             |    |
|---------------------------------------------------------------------------------------------------------------------------------------------------------------------------------------------------------------------------------------------------------------------------------------------|----|
| Table S1 Amounts used for each syntheses.....                                                                                                                                                                                                                                               | 3  |
| Table S2 Gel-time for formulations based on BADGE (the reference gel-time for the uncatalyzed reaction was 84 min).....                                                                                                                                                                     | 4  |
| Table S3 Gel-time for formulations based on LDO (the reference gel-time for the uncatalyzed reaction was 48 hours).....                                                                                                                                                                     | 5  |
| Table S4: Summary of the ICP-MS results.....                                                                                                                                                                                                                                                | 18 |
| Table S5: Summary of the ICP-OES results.....                                                                                                                                                                                                                                               | 19 |
| Table S6 Gel-time of an equimolar formulation of Epikure 3251 and BADGE containing 2 wt% of a commercial catalyst.....                                                                                                                                                                      | 22 |
| Table S7 Effect of the concentration of $\text{La}(\text{DS})_x$ (equimolar formulation of Epikure 3251 and BADGE) ...                                                                                                                                                                      | 23 |
| Table S8 Effect of the La : NaDS stoichiometry on gel-time (equimolar formulation of Epikure 3251 and BADGE, 2 wt% of catalyst). The catalyst synthesis is performed on 0.5 g of $\text{La}(\text{NO}_3)_3$ , with increasing amounts of SDS (0.34, 0.65, 0.99, 1.33 and 2.0 g of SDS)..... | 23 |
| Table S9 The effect of percent La (DS) <sub>3</sub> in Epicure/BADGE (50/50 mol.%) formulation on drying time ....                                                                                                                                                                          | 25 |
| Table S10 Fit parameters corresponding to kinetic curves S13-S17.....                                                                                                                                                                                                                       | 29 |
| Table S11 Comparison of the gel-time for various catalysts, $\text{La}(\text{DS})_x$ , $\text{La}(\text{OPh})_x$ and $\text{La}(\text{DBS})_x$ .....                                                                                                                                        | 31 |
| Table S12 Influence of the alkali-metal.....                                                                                                                                                                                                                                                | 31 |
| Table S13 Wavenumbers of the S-O vibrations in $\text{Ln}(\text{DS})_x$ complexes .....                                                                                                                                                                                                     | 32 |
| Table S14 Comparison of catalytic activity and $\text{SO}_2$ stretching wavenumber .....                                                                                                                                                                                                    | 34 |
| Table S15 Crystal data and data collection details for $\text{NaLa}(\text{DS})_4(\text{H}_2\text{O})_2$ .....                                                                                                                                                                               | 36 |

## I. Experimental Section

### I.1 Materials and methods

Limonene dioxide (LDO) was purchased from the company Symrise Chemical. Epikure 3251 was purchased from the Hexion company. All lanthanide nitrates were purchased from the Strem company. All other chemicals were purchased from Sigma Aldrich. Fourier Transformed Infrared spectroscopy (FTIR) were acquired on a Bomem MB104 spectrometer, using a Golden Gate attenuated total reflectance (ATR) module from Specac. Spectra were recorded between 4000 and 600  $\text{cm}^{-1}$  with a resolution of 2  $\text{cm}^{-1}$  using an average of 64 measurements in the final spectrum. Nuclear Magnetic Resonance (NMR) spectra were acquired on an Avance Neo 400 MHz spectrometer at ambient temperature using anhydrous benzene as internal standard. For solid-state NMR,  $^{13}\text{C}$  cross-polarization (CP) spectra were acquired on a Bruker AVANCE NEO 400 MHz wide bore spectrometer (Bruker Biospin, Milton, ON) with a 4 mm triple-resonance solid probe. The samples were packed into a 4 mm zirconia rotor spun at 13 kHz at room temperature. The spectra were measured at 100.56 MHz for the  $^{13}\text{C}$  nuclei with a cross-polarization and magic angle spinning (CP-MAS) pulse sequence. Proton decoupling was performed using a small phase incremental alteration (SPINAL64) decoupling pulse sequence. Using 3012 data points, CP-MAS spectra were acquired with a recycle delay of 5.0 s using a ramped-amplitude pulse sequence with a  $^1\text{H}$ - $^{13}\text{C}$  contact time of 2 ms. Either 1024 and 2048 scans were acquired for each spectrum and the spectral width was 30.1 kHz.

### I.2 Synthesis of the catalysts

Amounts used for each synthesis are consigned in Table S1. A representative procedure is described for cerium. In a 125 mL Erlenmeyer loaded with a magnetic stirred bar, 0.996 g of sodium dodecyl sulfate were dissolved in 37.5 mL of deionized water at room temperature. Another aqueous solution was prepared by dissolving 0.500 g of Cerium (III) nitrate hexahydrate in 12.5 mL of deionized water, and then added into the Erlenmeyer while stirring. After 3 min of stirring, the solid formed was recovered by Büchner filtration over a paper filter and washed 3 times with 25 mL of deionized water. The solid was then dried in a vacuum oven (50 Torr, 60°C) for 24 hours, giving 1.036 g of a white powder.

Table S1 Amounts used for each syntheses

| Lanthanide used | SDS (g) | $\text{Ln}(\text{NO}_3)_3$ (g) | $\text{Ln}(\text{DS})_x$ (g) | Aspect of the solid |
|-----------------|---------|--------------------------------|------------------------------|---------------------|
| La              | 0.999   | 0.500                          | 1.055                        | White               |
| Pr              | 0.994   | 0.500                          | 1.037                        | Greenish            |
| Nd              | 0.987   | 0.500                          | 1.036                        | Pale magenta        |
| Sm              | 0.973   | 0.500                          | 1.008                        | Ivory               |
| Eu              | 0.970   | 0.500                          | 1.025                        | White               |
| Gd              | 0.961   | 0.500                          | 1.019                        | White               |
| Tb              | 0.955   | 0.500                          | 0.962                        | White               |
| Ho              | 0.981   | 0.500                          | 0.996                        | Pale Orange         |
| Er              | 0.976   | 0.500                          | 1.017                        | Pink                |
| Tm              | 0.934   | 0.500                          | 0.974                        | White               |
| Yb              | 0.963   | 0.500                          | 1.019                        | White               |
| Lu              | 0.922   | 0.500                          | 1.005                        | White               |

### I.3 Measurement of gel-time

First, the catalyst and cross-linker were mixed inside a 20 mL vial using an ultrasonic bath with slight heating. Then the epoxy monomer was added to the mixture. Immediately after, the vial was thermostated in a water or sand bath in order to absorb the reaction heat and the mixture was continuously stirred by a wire stirrer (Figure S1) and the gel-time corresponds to the time it takes for the wire to stop stirring. The various formulations used for gel-time measurements are detailed in Table S2 and S3.

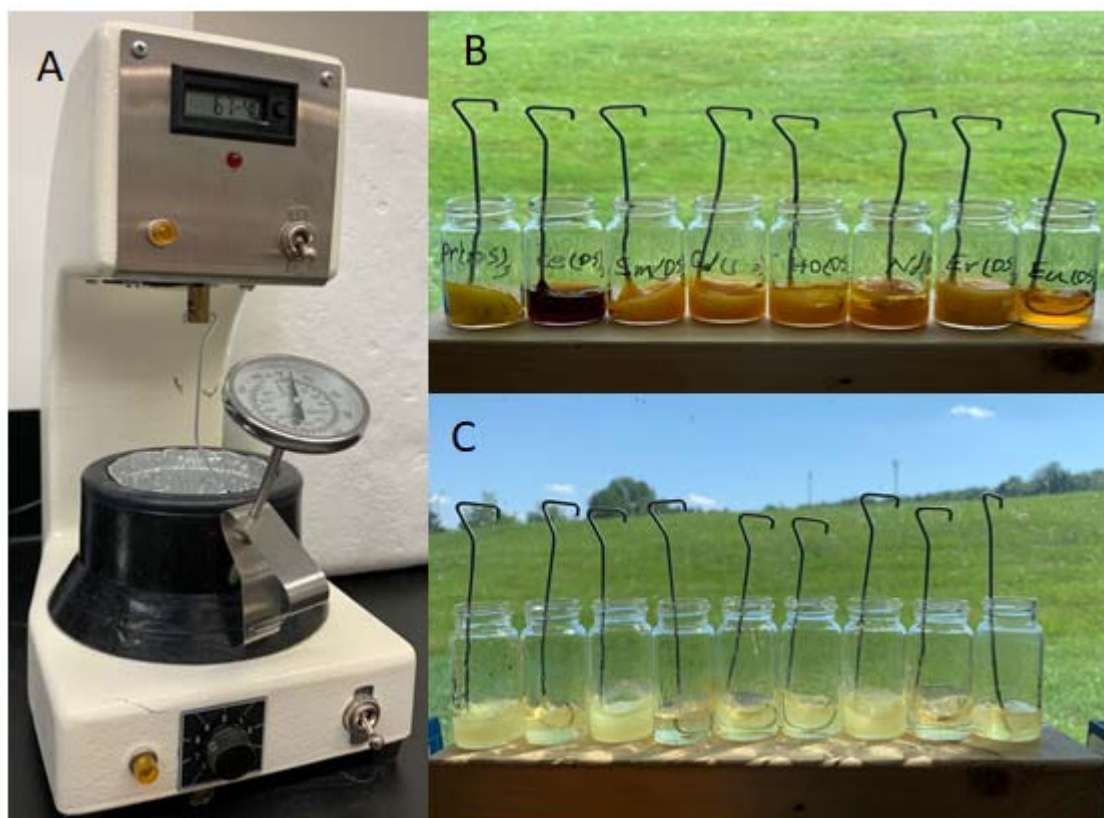

Figure S1 A. gel-time measurement setup. B. Various solid LDO-PEI formulations. C. Various solid BADGE-Epikure formulations.

Table S2 Gel-time for formulations based on BADGE (the reference gel-time for the uncatalyzed reaction was 84 min)

| Dodecyl sulfates catalysts  | La | Ce | Pr | Nd | Sm | Eu | Gd   | Tb | Ho | Er | Tm | Yb | Lu |
|-----------------------------|----|----|----|----|----|----|------|----|----|----|----|----|----|
| Mass of BADGE (g)           |    |    |    |    |    |    | 3.40 |    |    |    |    |    |    |
| Mass of Epikure 3251 (g)    |    |    |    |    |    |    | 1.52 |    |    |    |    |    |    |
| Mass of catalyst (g)        |    |    |    |    |    |    | 0.10 |    |    |    |    |    |    |
| Gel-time (min) <sup>a</sup> | 24 | 50 | 44 | 47 | 43 | 57 | 56   | 62 | 62 | 63 | 53 | 51 | 64 |

Table S3 Gel-time for formulations based on LDO (the reference gel-time for the uncatalyzed reaction was 48 hours)

| Dodecyl sulfates catalysts   | La | Ce | Pr | Nd | Sm | Eu | Gd   | Tb | Ho | Er | Tm | Yb | Lu |
|------------------------------|----|----|----|----|----|----|------|----|----|----|----|----|----|
| Mass of LDO (g)              |    |    |    |    |    |    | 3.00 |    |    |    |    |    |    |
| Mass of Polyethylenimine (g) |    |    |    |    |    |    | 2.00 |    |    |    |    |    |    |
| Mass of catalyst (g)         |    |    |    |    |    |    | 0.92 |    |    |    |    |    |    |
| Gel-stime (h) <sup>a</sup>   | 6  | 10 | 11 | 12 | 12 | 16 | 25   | 12 | 15 | 16 | 18 | 15 | 13 |

#### I.4 Measurement of the drying time

This procedure was adapted from ASTM D5895. In a 20 mL vial, the catalyst La(DS)<sub>x</sub> (0.1 g) was dissolved in Epikure 3251 (3.04g). Then, BADGE (6.81 g) was then added into the vial and quickly mixed with a glass rod for 1 min. The resulting viscous mixture was poured over a glass plate and spread with a universal blade applicator (GARDCO company) set at a nominal 10 mils thickness (250 micrometers). Every 15 min, the film was gently scratch with a needle, and the film was declared dry when the needle did not leave any mark on the film.

#### I.5 X-ray PhotoElectron Spectroscopy (XPS)

Analyses were performed on a Physical Electronics XPS PHI 5600-ci instrument equipped with an Al anode (1486.6 eV) at 300 W in survey mode, using the charge compensation mode. High resolution analyses were performed at an incident angle of 45 ° on a surface of 0.5 mm<sup>2</sup>. High resolution spectra were performed on C<sub>1s</sub>, O<sub>1s</sub> and S<sub>2p</sub> using 30, 30 et 60 scans respectively.

#### I.6 Inductive Coupled Plasma (ICP)

ICP-MS measurements were performed on a X series II instrument from ThermoFisher Instrument equipped with a Elemental Scientific PC<sup>3</sup> Peltier spray chamber. The nebulizer gaz flow was set at 0.98 L/min, the forward power at 1400 W, the cooling gas at 13 L/min, the auxiliary gas at 0.8 L/min. For each run, 100 sweeps with dwell times of 10 ms were performed. The monitored isotopes were <sup>45</sup>Sc, <sup>89</sup>Y, <sup>139</sup>La, <sup>140</sup>Ce, <sup>141</sup>Pr, <sup>143</sup>Nd, <sup>146</sup>Nd, <sup>147</sup>Sm, <sup>153</sup>Eu, <sup>155</sup>Gd, <sup>157</sup>Gd, <sup>159</sup>Tb, <sup>161</sup>Dy, <sup>163</sup>Dy, <sup>165</sup>Ho, <sup>166</sup>Er, <sup>167</sup>Er, <sup>169</sup>Tm, <sup>172</sup>Yb and <sup>175</sup>Lu using <sup>103</sup>Rh as internal standard. ICP-OES measurements were performed an Agilent Technology 5100 ICP-OES instrument. The instrument was calibrated for S, Ce, Pr, Nd, La, Y, Sm, Eu, Gd, Tb, Dy, Ho, Er, Tm, Yb and Lu, using ICP-OES standards purchased at Sigma-Aldrich. Samples (analysed both by ICP-MS and ICP-OES) were prepared by dissolving a known amount of catalyst (approx. 10 mg) in 2 mL of of HNO<sub>3</sub> (Tracecert® grade) for 4 h at 65°C. Then, 2 mL of HNO<sub>3</sub> were added to this solution for a second heating step of 2h at 85°C in order to ensure complete dissolution. All sample were analysed as a triplicate

### I.7 Single Crystal X-ray Diffraction

A Plate-like specimen of C<sub>48</sub>H<sub>110</sub>LaNaO<sub>18</sub>S<sub>4</sub>, approximate dimensions 0.025 mm x 0.160 mm x 0.544 mm, was used for the X-ray crystallographic analysis. The X-ray intensity data were measured ( $\lambda = 0.71073$  Å). The total exposure time was 4.41 hours. The frames were integrated with the Bruker SAINT software package using a wide-frame algorithm. Details about sample collection can be found in Table S15. The Ortep representation is found in Figure S15.

### I.8 Differential Scanning Calorimetry

Differential Scanning Calorimetry (DSC) measurements were performed on a DSC 7 from Mettler-Toledo under nitrogen flux of 20mL/min equipped with an autosampler and a cooler. For each formulation, a sample containing the appropriate mixture of LDO and hardener was vigorously mixed using a vortex for 2 min. The resulting homogeneous and viscous liquid was then immediately placed in a DSC pan, which was hermetically sealed. The sample was then placed on the autosampler and was introduced in the oven which was pre-heated at the requested temperature.

Figure S2 XPS – Survey mode for La(DS)x catalyst

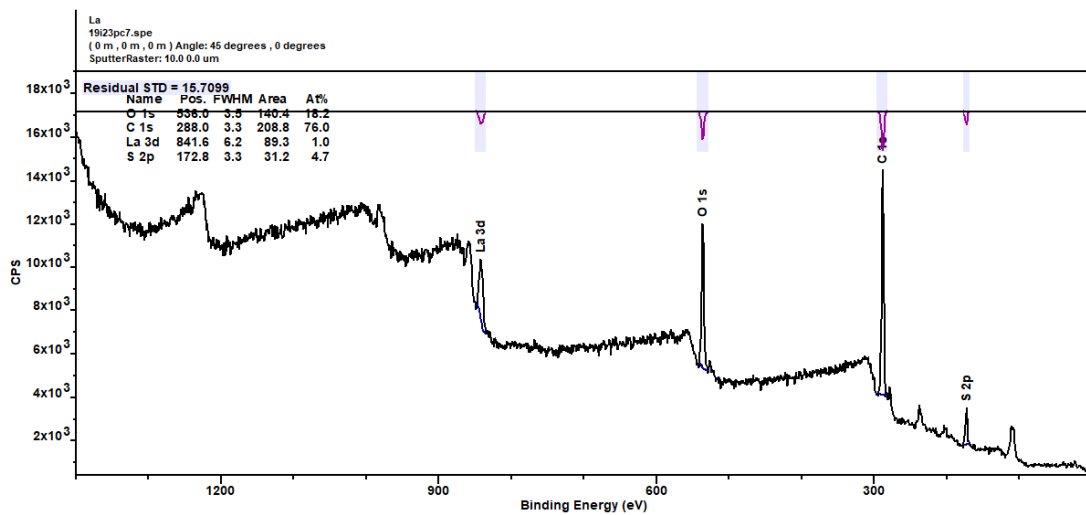

Figure S3 : XPS – Survey mode for Ce(DS)<sub>x</sub> catalyst

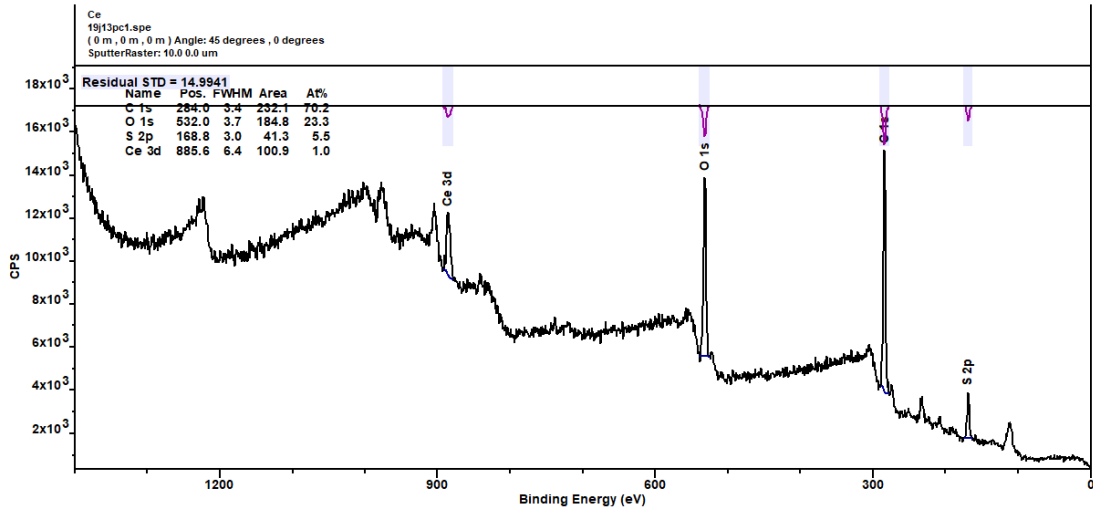



Figure S4 : XPS – Survey mode for Pr(DS)<sub>x</sub> catalyst

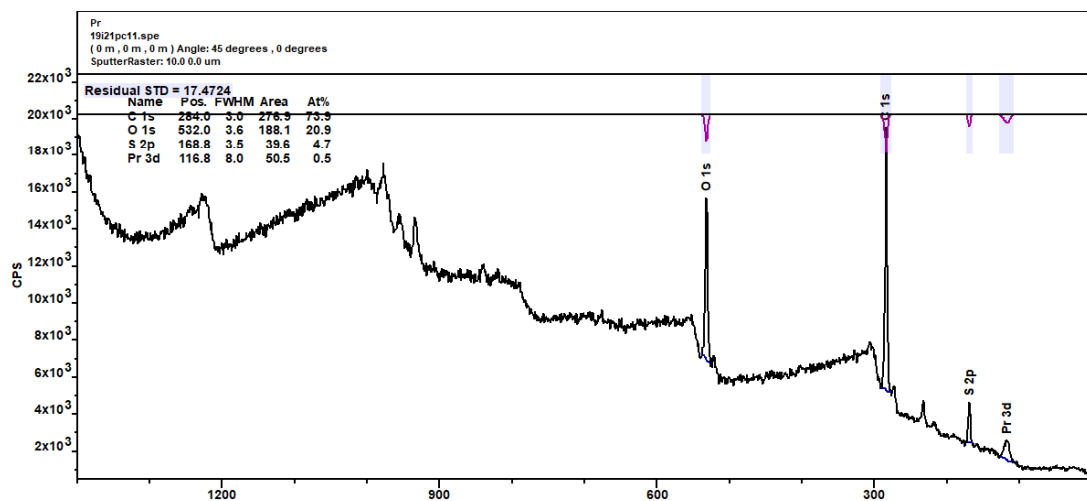

Figure S5 : XPS – Survey mode for  $Sm(DS)_x$  catalyst

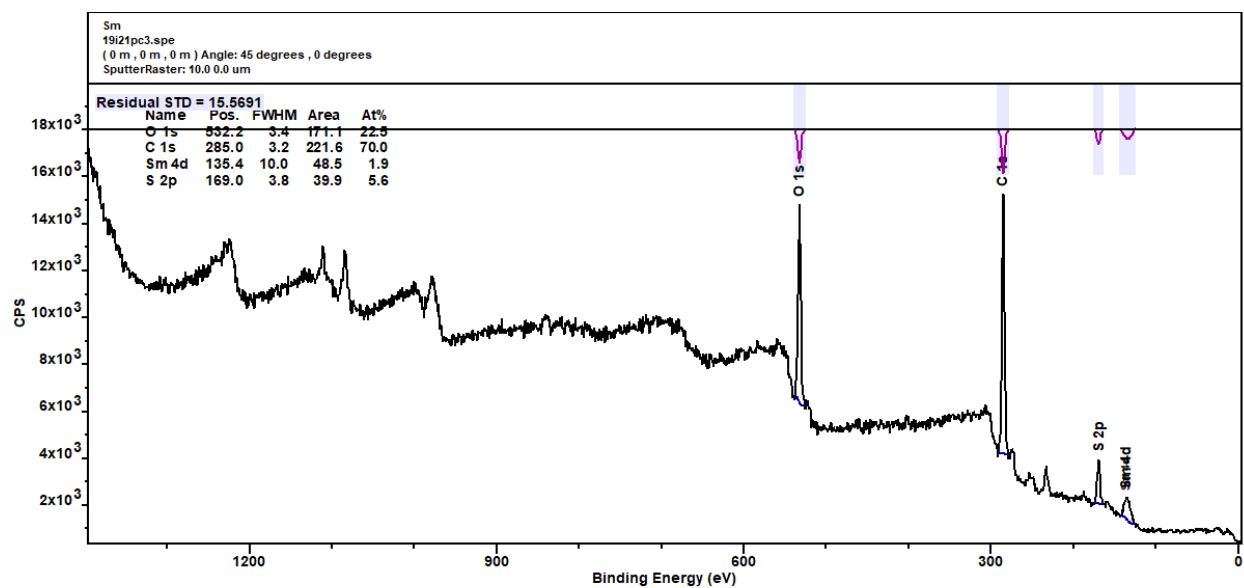

Figure S6 : XPS – Survey mode for Eu(DS)<sub>x</sub> catalyst

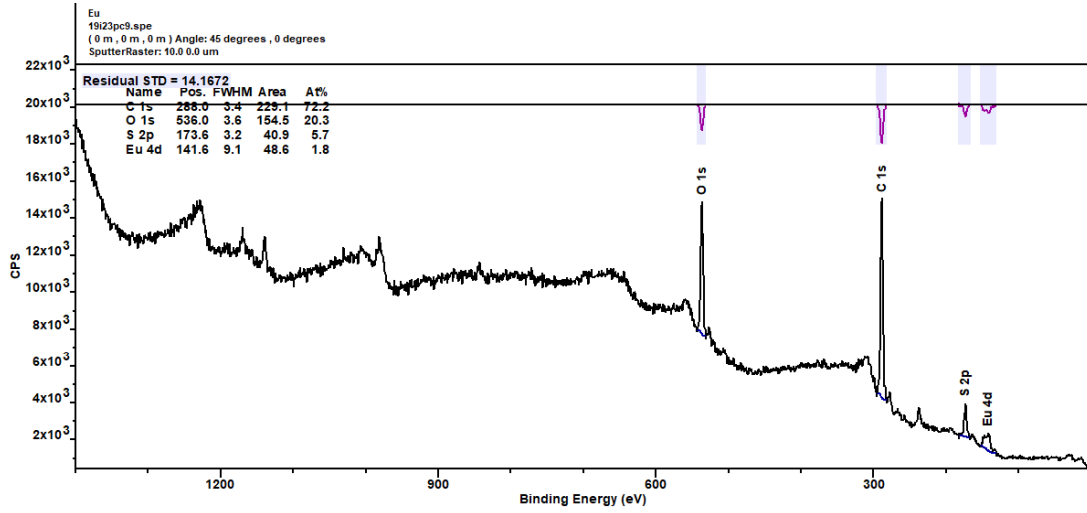

Figure S7 : XPS – Survey mode for Gd(DS)<sub>x</sub> catalyst

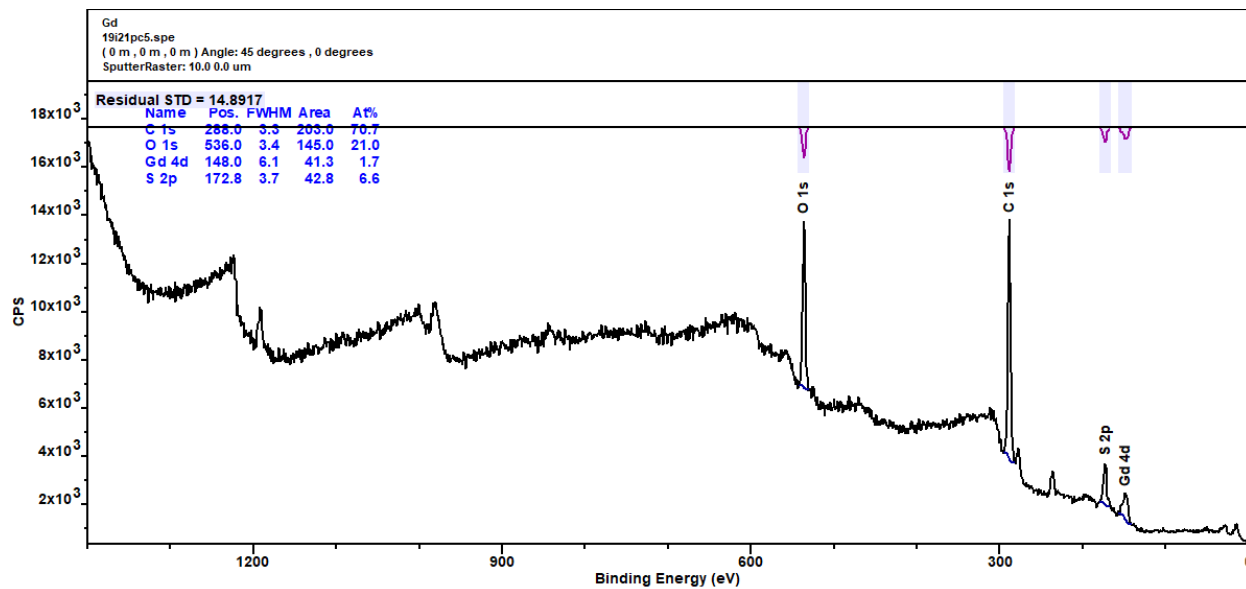

Figure S8 : XPS – Survey mode for Tb(DS)<sub>x</sub> catalyst

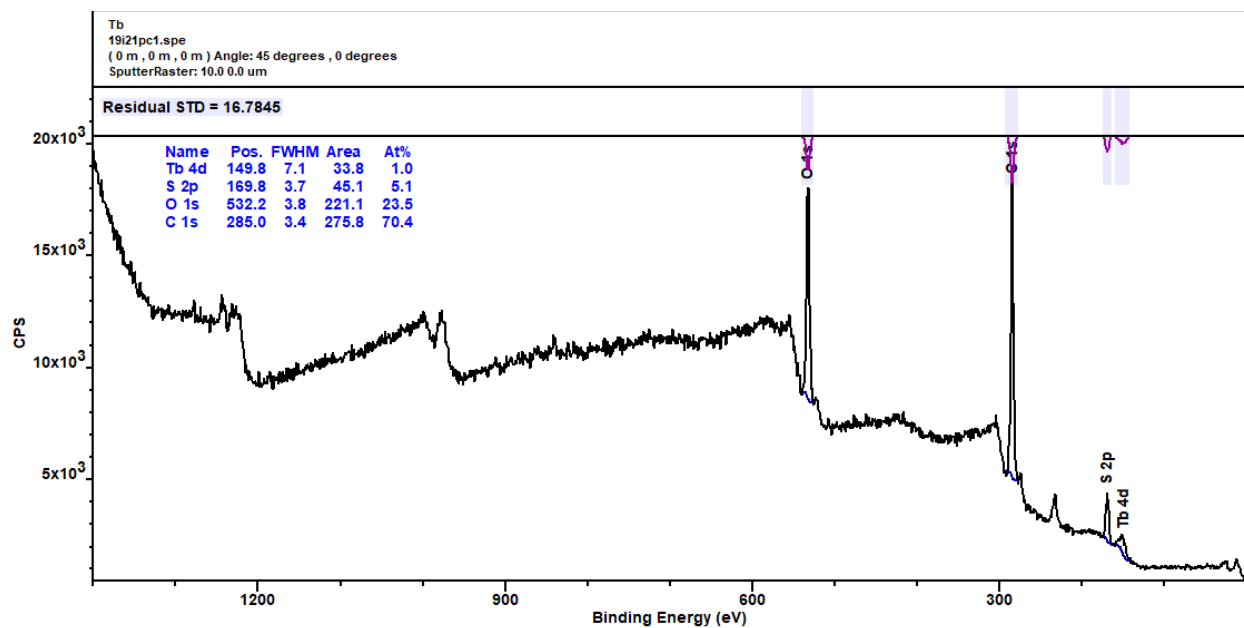

Figure S9 : XPS – Survey mode for Tm(DS)<sub>x</sub> catalyst

S

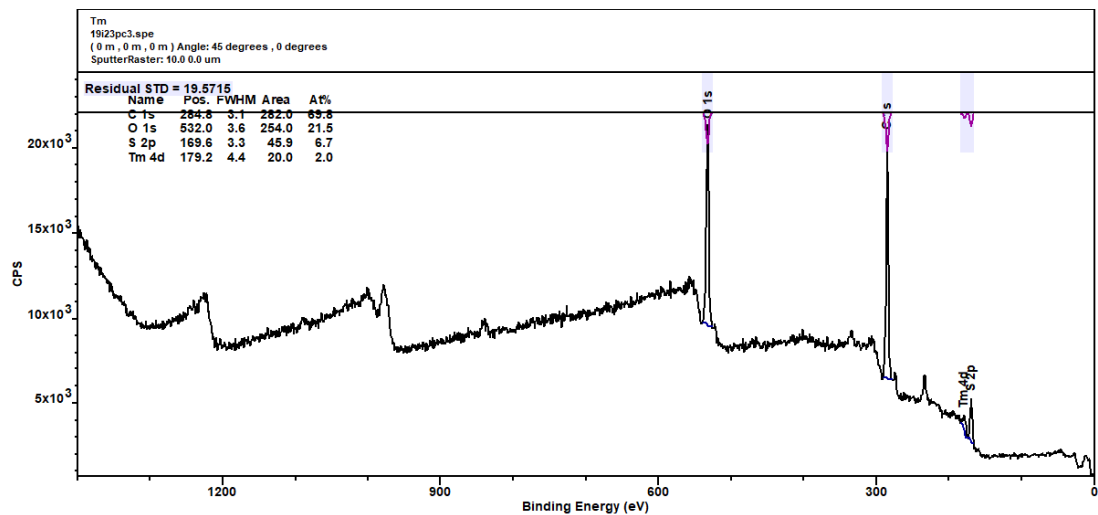

Figure S10 : XPS – Survey mode for Yb(DS)<sub>x</sub> catalyst

S

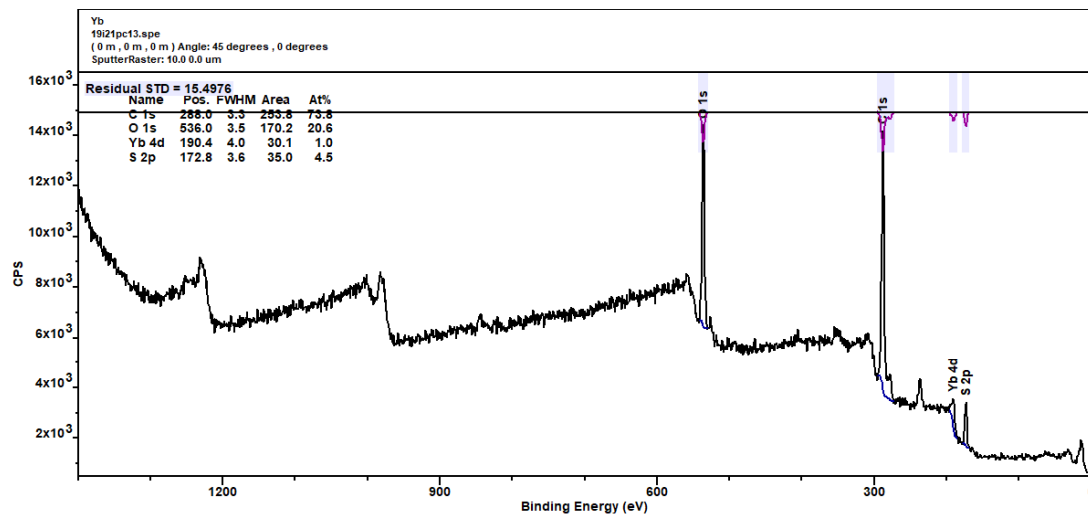

Figure S11 : XPS – Survey mode for Lu(DS)<sub>x</sub> catalyst

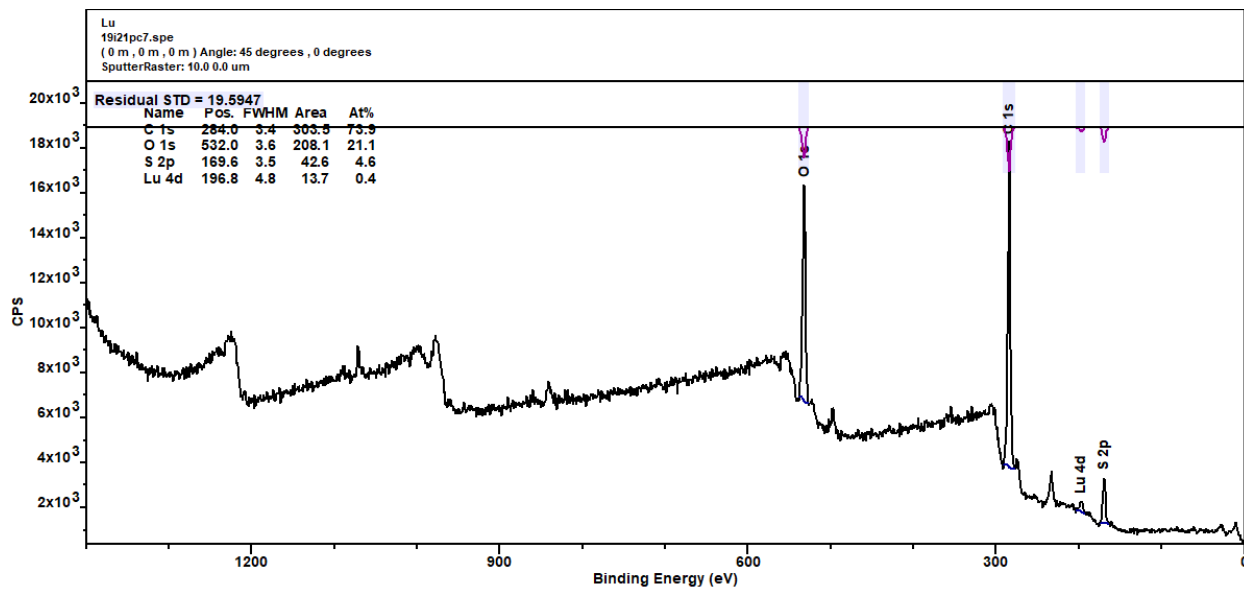



Figure S12 :  $^1\text{H}$  NMR (400MHz, DMSO- $d_6$ ) of  $\text{La}(\text{DS})_x$  and benzene as internal standard

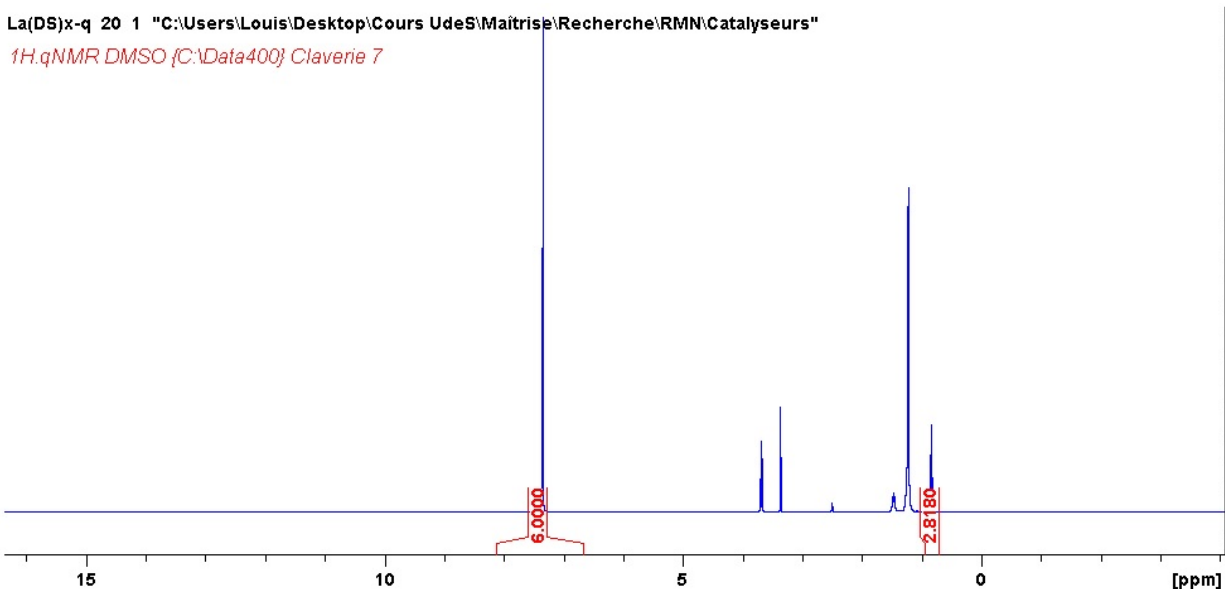

In a clean NMR tube, 48.36 mg of  $\text{La}(\text{DS})_x$  catalyst and 12.58 mg of benzene (0.161 mmol) were added to 0.5 mL of DMSO- $D_6$ . From the benzene integral, it was found that an integral of 1 corresponds to 0.161 mmol of protons. The  $\text{CH}_3$  signal of  $\text{La}(\text{DS})_x$  has an integral of 2.818. Thus, there are 0.151 mmol of  $\text{CH}_3$  groups.

The molecular weight of  $\text{La}(\text{DS})_x$  is  $138 + 265x + (2-x)18$  (considering that the  $\text{La}(\text{DS})_x$  is hydrated and is octa-coordinated). Thus,

$$\frac{x}{138 + 265x + 18 \cdot (2 - x)} = \frac{0.151}{48.36}$$

This leads to  $x = 3.85$  (Not taking hydration water in the hydration sphere leads to  $x = 2.5$ )

Table S4: Summary of the ICP-MS results

| Compounds                 | % Lanthanide exp | Value of x in<br>$\text{La}(\text{DS})_x\text{Na}_{x-3}(\text{H}_2\text{O})_{x-2}$ |
|---------------------------|------------------|------------------------------------------------------------------------------------|
| <b>Ce(DS)<sub>x</sub></b> | 10.78 ± 0,50     | 4.1                                                                                |
| <b>Pr(DS)<sub>x</sub></b> | 10.26 ± 0,12     | 4.3                                                                                |
| <b>Nd(DS)<sub>x</sub></b> | 11.41 ± 1,04     | 4.0                                                                                |
| <b>Sm(DS)<sub>x</sub></b> | 13.63 ± 0,21     | 4.4                                                                                |
| <b>Eu(DS)<sub>x</sub></b> | 12.02 ± 0,68     | 3.4                                                                                |
| <b>Gd(DS)<sub>x</sub></b> | 13.60 ± 1,12     | 4.0                                                                                |
| <b>Tb(DS)<sub>x</sub></b> | 13.13 ± 1,10     | 3.8                                                                                |
| <b>Ho(DS)<sub>x</sub></b> | 12.80 ± 0,86     | 4.0                                                                                |
| <b>Er(DS)<sub>x</sub></b> | 13.24 ± 0,43     | 3.9                                                                                |
| <b>Tm(DS)<sub>x</sub></b> | 14.84 ± 1,49     | 3.5                                                                                |
| <b>Yb(DS)<sub>x</sub></b> | 15.63 ± 0,48     | 3.3                                                                                |
| <b>Lu(DS)<sub>x</sub></b> | 11.21 ± 0,63     | 4.5                                                                                |

Table S5: Summary of the ICP-OES results

| <b>Compounds</b> | <b>S/Ln</b> | <b>Standard Deviation</b> |
|------------------|-------------|---------------------------|
| <b>La(DS)x</b>   | 3.8         | 0.3                       |
| <b>Ce(DS)3</b>   | 3.7         | 0.2                       |
| <b>Pr(DS)3</b>   | 3.2         | 0.1                       |
| <b>Nd(DS)3</b>   | 3.2         | 0.1                       |
| <b>Sm(DS)3</b>   | 3.1         | 0.3                       |
| <b>Eu(DS)3</b>   | 2.8         | 0.3                       |
| <b>Gd(DS)3</b>   | 3.0         | 0.1                       |
| <b>Tb(DS)3</b>   | 3.8         | 0.7                       |
| <b>Ho(DS)3</b>   | 3.7         | 0.7                       |
| <b>Er(DS)3</b>   | 3.6         | 0.1                       |
| <b>Tm(DS)3</b>   | 2.9         | 0.2                       |
| <b>Yb(DS)3</b>   | 2.3         | 0.6                       |
| <b>Lu(DS)3</b>   | 3.4         | 0.8                       |

Figure S13 Environment of the La atom in the crystal cell and corresponding bond distances.

| Rank | Bond   | From | To    | d [Å]   |
|------|--------|------|-------|---------|
| 1    | La - O | La1  | O2_1  | 2.41711 |
| 2    | La - O | La1  | O2_4  | 2.42791 |
| 3    | La - O | La1  | O2_3  | 2.45700 |
| 4    | La - O | La1  | O4_1  | 2.47316 |
| 5    | La - O | La1  | O4A_1 | 2.47540 |
| 6    | La - O | La1  | O4_3  | 2.47808 |
| 7    | La - O | La1  | O2W   | 2.48243 |
| 8    | La - O | La1  | O4_2  | 2.50282 |
| 9    | La - O | La1  | O2A_1 | 2.50894 |
| 10   | La - O | La1  | O1W   | 2.63201 |

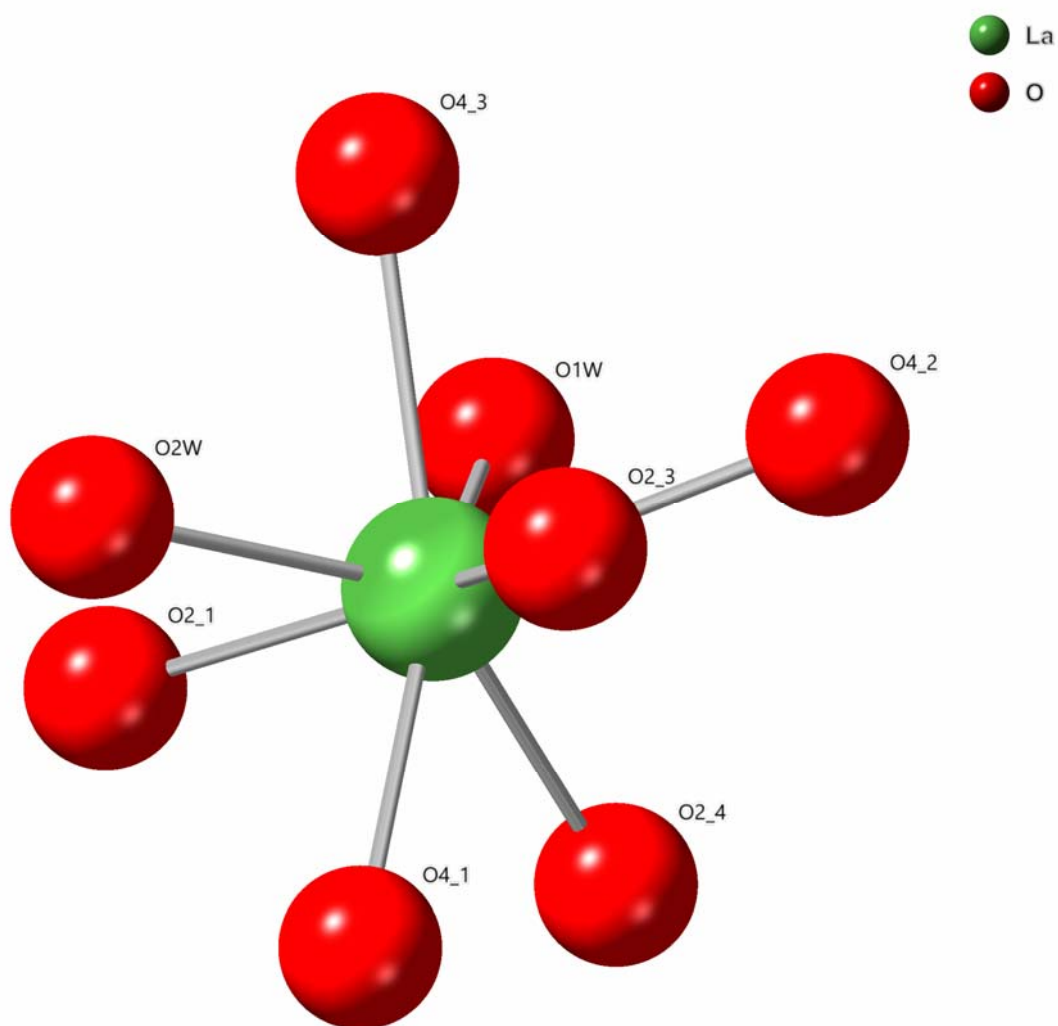

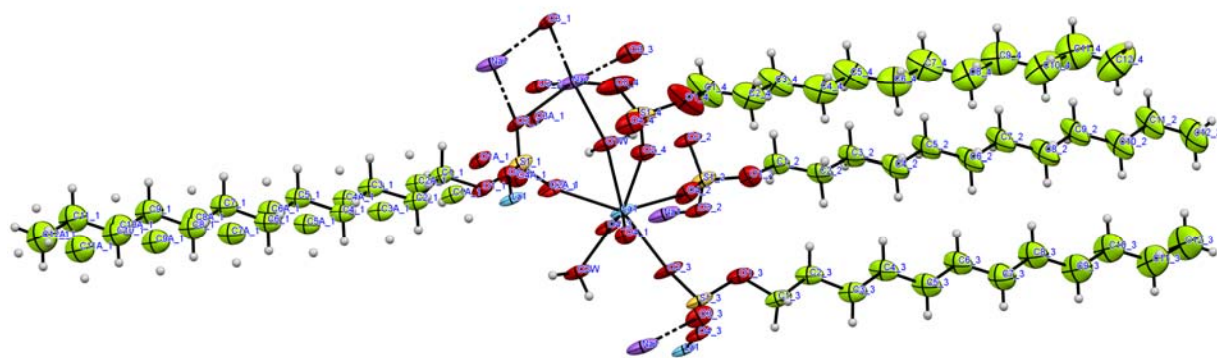

Figure S14 ORTEP diagram of NaLa(DS)<sub>4</sub>(H<sub>2</sub>O)<sub>2</sub>

Table S6 Gel-time of an equimolar formulation of Epikure 3251 and BADGE containing 2 wt% of a commercial catalyst

| Catalyst (2%wt)            | Gel-time (min) |
|----------------------------|----------------|
| Without catalyst           | 84             |
| Benzyl alcohol             | 67             |
| Nonylphenol                | 61             |
| Triethanolamine            | 60             |
| DMP-30                     | 52             |
| <b>La (DS)<sub>3</sub></b> | 24             |

Table S7 Effect of the concentration of  $\text{La}(\text{DS})_x$  (equimolar formulation of Epikure 3251 and BADGE)

| Catalyst $\text{La}(\text{DS})_3$<br>(%wt) | Gel-time<br>(min) |
|--------------------------------------------|-------------------|
| 0                                          | 86                |
| 0.5                                        | 63                |
| 1                                          | 42                |
| 2                                          | 25                |
| 3                                          | 19                |

Table S8 Effect of the  $\text{La} : \text{NaDS}$  stoichiometry on gel-time (equimolar formulation of Epikure 3251 and BADGE, 2 wt% of catalyst). The catalyst synthesis is performed on 0.5 g of  $\text{La}(\text{NO}_3)_3$ , with increasing amounts of SDS (0.34, 0.65, 0.99, 1.33 and 2.0 g of SDS)

| $\text{La}^{3+} : \text{DS}^-$<br>Mol: mol | Yield<br>(g) | Gel-time<br>(min) |
|--------------------------------------------|--------------|-------------------|
| 1:1                                        | 0.35         | 21                |
| 1:2                                        | 0.69         | 26                |
| 1:3                                        | 1.05         | 28                |
| 1:4                                        | 1.21         | 25                |
| 1:6                                        | 0.87         | 58                |

Figure S15 Inverse of the gel time vs  $\text{La}(\text{DS})_x$  catalyst concentration (equimolar formulation of Epikure 3251 and BADGE)

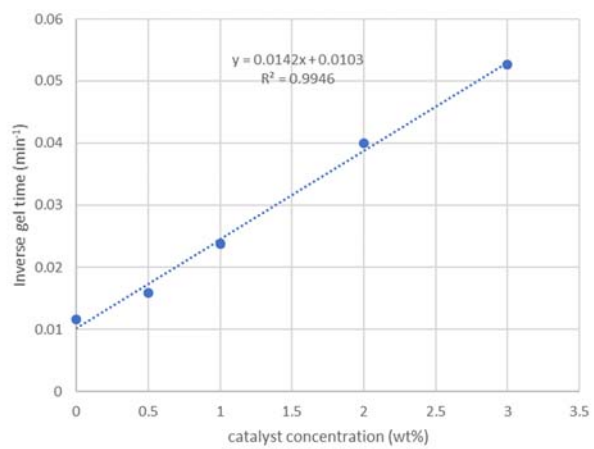



Table S9 The effect of percent La (DS)<sub>3</sub> in Epicure/BADGE (50/50 mol.%) formulation on drying time

| Catalyst La (DS) <sub>3</sub><br>(%wt) | Dry time<br>(min) |
|----------------------------------------|-------------------|
| 0                                      | 120               |
| 1                                      | 90                |
| 2                                      | 60                |

Figure S16 Experimental and fitted curve  $dx/dt$  vs conversion ( $x$ ) at 173°C, 188°C and 203°C (LDO:PEI = 60:40 wt%, no catalyst)

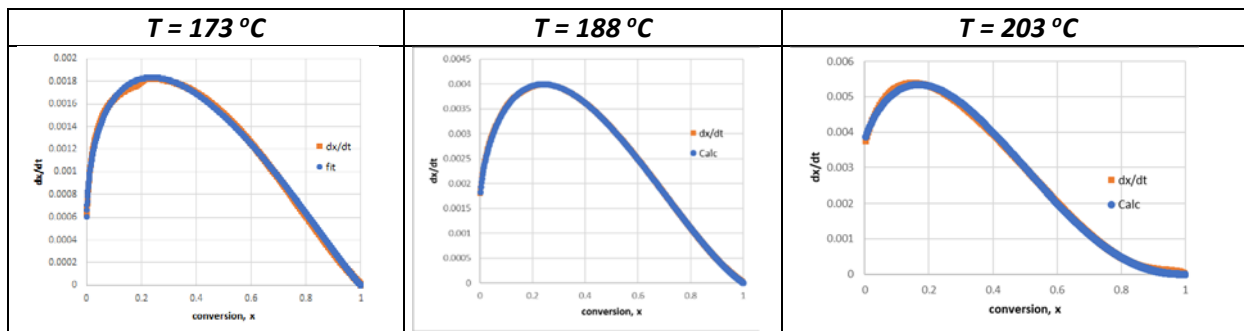

Figure S17 Experimental and fitted curve  $dx/dt$  vs conversion ( $x$ ) at 109°C, 139°C and 169°C (LDO:PEI = 60:40 wt%, 2 wt% of La(DS)x)

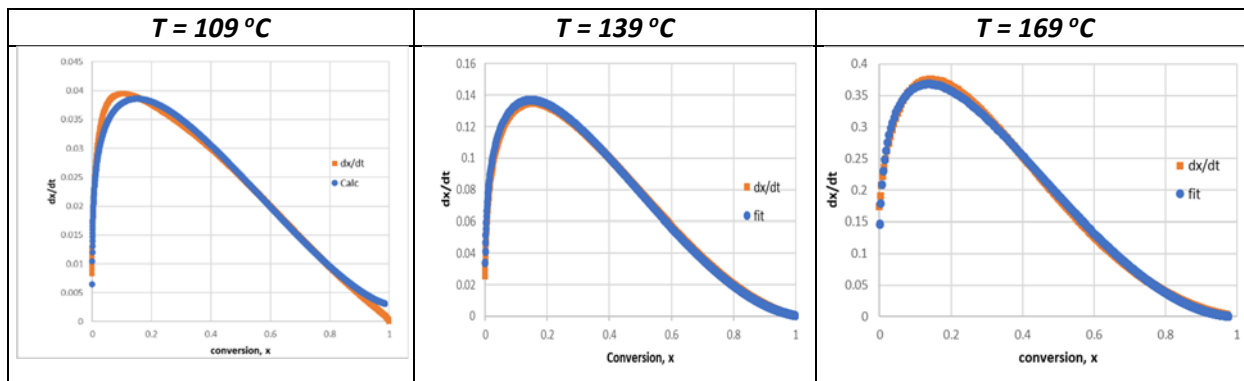

Figure S18 Experimental and fitted curve  $dx/dt$  vs conversion ( $x$ ) at 109°C, 139°C and 169°C (LDO:PEI = 60:40 wt%, 2 wt% of Pr(DS)<sub>x</sub>)

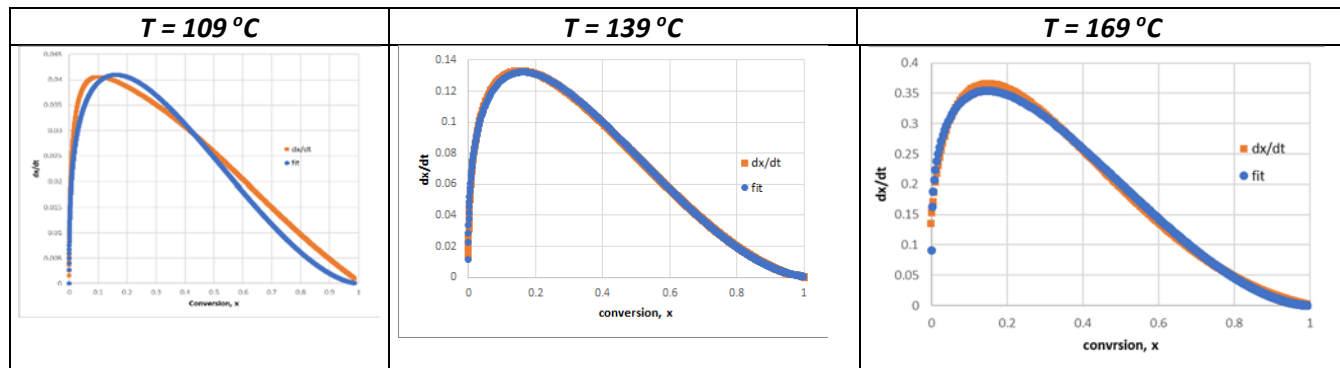

Figure S19 Experimental and fitted curve  $dx/dt$  vs conversion ( $x$ ) at 109°C, 139°C and 169°C (LDO:PEI = 60:40 wt%, 2 wt% of Gd(DS)<sub>x</sub>)

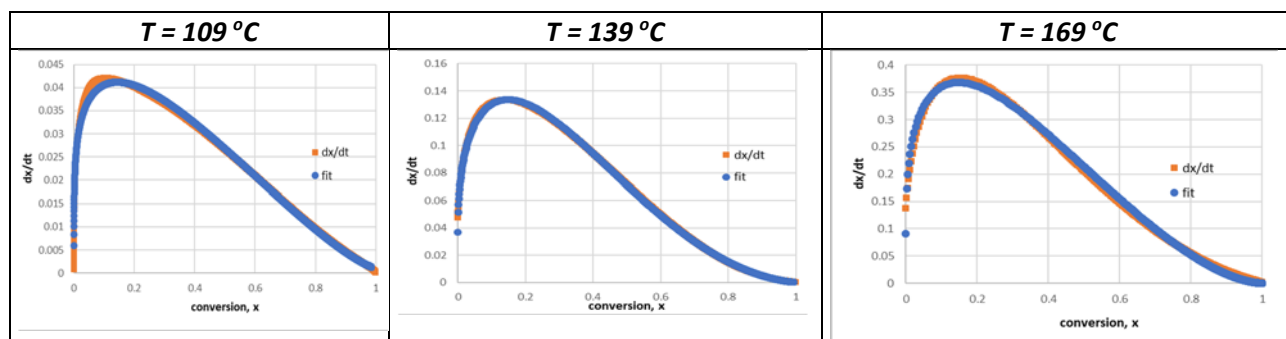

Figure S20 Experimental and fitted curve  $dx/dt$  vs conversion ( $x$ ) at 109°C, 139°C and 169°C (LDO:PEI = 60:40 wt%, 2 wt% of Eu(DS)<sub>x</sub>)

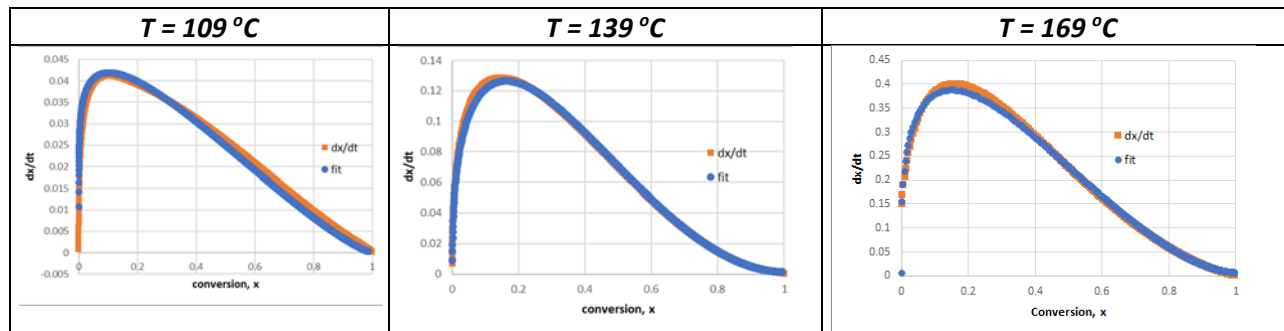

Table S10 Fit parameters corresponding to kinetic curves S13-S17

No catalyst

| Parameter | T = 173 °C | T = 188 °C | T = 203 °C |
|-----------|------------|------------|------------|
| $k_1$     | 0.00045    | 0.0016     | 0.0037     |
| $m_1$     | 1.12       | 0.84       | 3.42       |
| $k_2$     | 0.0037     | 0.010      | 0.025      |
| $m_2$     | 0.43       | 0.630      | 0.89       |
| $n_2$     | 1.12       | 1.60       | 2.36       |

2% La(DS)<sub>x</sub>

| Parameter | T = 109 °C | T = 139 °C | T = 169 °C |
|-----------|------------|------------|------------|
| $k_1$     | 0          | 0.0078     | 0.087      |
| $m_1$     | 1.83       | 0.51       | 3.27       |
| $k_2$     | 0.099      | 0.33       | 0.91       |
| $m_2$     | 0.33       | 0.35       | 0.39       |
| $n_2$     | 1.69       | 1.82       | 1.92       |

2% Pr(DS)<sub>x</sub>

| Parameter | T = 109 °C | T = 139 °C | T = 169 °C |
|-----------|------------|------------|------------|
| $k_1$     | 0.00023    | 0.0032     | 0.091      |
| $m_1$     | 0.90       | 0.35       | 3.26       |
| $k_2$     | 0.076      | 0.33       | 0.87       |
| $m_2$     | 0.23       | 0.35       | 0.41       |
| $n_2$     | 1.43       | 1.78       | 1.78       |

2% Gd(DS)<sub>x</sub>

| Parameter | T = 109 °C | T = 139 °C | T = 169 °C |
|-----------|------------|------------|------------|
| $k_1$     | 0.0015     | 0.037      | 0.090      |
| $m_1$     | 0.086      | 1.07       | 3.27       |
| $k_2$     | 0.076      | 0.34       | 0.87       |
| $m_2$     | 0.23       | 0.44       | 0.39       |
| $n_2$     | 1.36       | 2.23       | 1.70       |

2% Eu(DS)<sub>x</sub>

| Parameter      | T = 109 °C | T = 139 °C | T = 169 °C |
|----------------|------------|------------|------------|
| k <sub>1</sub> | 0.00060    | 0.0014     | 0.0066     |
| m <sub>1</sub> | 0.68       | 0.0028     | 0.0029     |
| k <sub>2</sub> | 0.067      | 0.36       | 0.89       |
| m <sub>2</sub> | 0.15       | 0.38       | 0.30       |
| n <sub>2</sub> | 1.30       | 1.98       | 1.71       |

Table S11 Comparison of the gel-time for various catalysts,  $La(DS)_x$ ,  $La(OPh)_x$  and  $La(DBS)_x$

| Formulations                | Gel-time of $La(DBS)_x$ | Gel-time of $La(OPh)_x$ | Gel-time of $La(DS)_x$ | Without catalyst |
|-----------------------------|-------------------------|-------------------------|------------------------|------------------|
| LDO-PEI (60/40 wt%)         | 39h                     | 42h                     | 33h                    | >48h             |
| BADGE-Epikure (50/50 mol.%) | 43min                   | 55min                   | 24min                  | 84min            |

Table S12 Influence of the alkali-metal

| Reactants                                            | Gel-time (min) |
|------------------------------------------------------|----------------|
| Lithium dodecyl sulfate + $La(NO_3)_3 \cdot 6H_2O$   | 27             |
| Sodium dodecyl sulfate + $La(NO_3)_3 \cdot 6H_2O$    | 28             |
| Potassium dodecyl sulfate + $La(NO_3)_3 \cdot 6H_2O$ | 30             |

Table S13 Wavenumbers of the S-O vibrations in Ln(DS)<sub>x</sub> complexes

| IR Peak<br>Material | Peak of asymmetric<br>stretching S-O (cm-1) | Peak of asymmetric<br>stretching S-O(cm-1) | Peak of symmetric<br>stretching S-O(cm-1) | Peak of symmetric<br>stretching S-O(cm-1) |
|---------------------|---------------------------------------------|--------------------------------------------|-------------------------------------------|-------------------------------------------|
| SDS                 | 1218                                        |                                            | 1081                                      |                                           |
| La(DS) <sub>3</sub> | 1194                                        | 1158                                       | 1103                                      | 1082                                      |
| Ce(DS) <sub>3</sub> | 1195                                        | 1159                                       | 1103                                      | 1082                                      |
| Pr(DS) <sub>3</sub> | 1196                                        | 1161                                       | 1102                                      | 1084                                      |
| Nd(DS) <sub>3</sub> | 1196                                        | 1161                                       | 1103                                      | 1084                                      |
| Sm(DS) <sub>3</sub> | 1177                                        | 1166                                       | 1102                                      | 1091                                      |
| Eu(DS) <sub>3</sub> | 1179                                        | 1169                                       | 1102                                      | 1096                                      |
| Gd(DS) <sub>3</sub> | 1179                                        | 1170                                       | 1104                                      | 1099                                      |
| Tb(DS) <sub>3</sub> | 1182                                        | Lost                                       | 1106                                      | Lost                                      |
| Ho(DS) <sub>3</sub> | 1184                                        | Lost                                       | 1107                                      | 1096                                      |
| Er(DS) <sub>3</sub> | 1207                                        | 1193                                       | 1108                                      | 1093+1071                                 |
| Tm(DS) <sub>3</sub> | 1193                                        | Lost                                       | 1110                                      | 1096 +1077                                |
| Yb(DS) <sub>3</sub> | 1210                                        | 1193                                       | 1108                                      | 1096+ 1071                                |
| Lu(DS) <sub>3</sub> | 1212                                        | 1196                                       | 1111                                      | 1095+1079                                 |



Figure S21 Calculated vibrations for  $\text{NaSO}_4\text{CH}_3$  at  $1076\text{ cm}^{-1}$  and  $1225\text{ cm}^{-1}$  (the vectors indicate the direction of displacement)

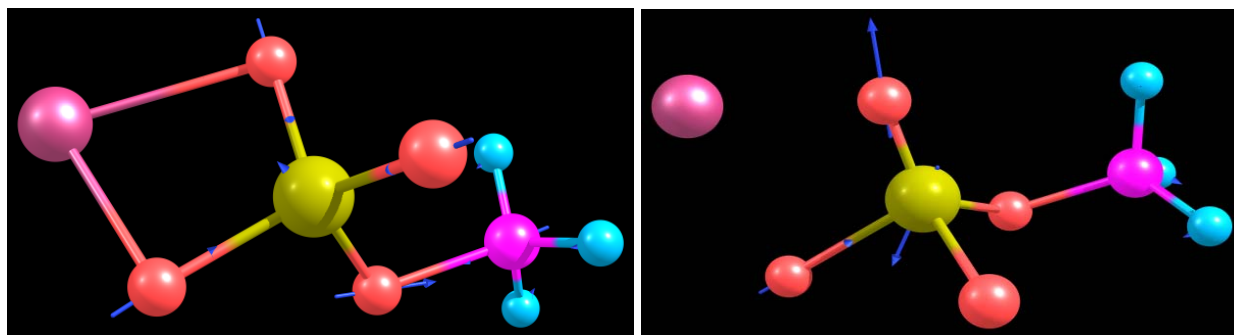

The molecule was optimized using the def2tzvpp basis set and the MO6 DFT method.

Table S14 Comparison of catalytic activity and SO<sub>2</sub> stretching wavenumber

| fastest to slowest LDO curing | fastest to slowest conventional epoxy curing | lowest to highest asym stretching (cm <sup>-1</sup> ) | lowest to highest sym stretching (cm <sup>-1</sup> ) |
|-------------------------------|----------------------------------------------|-------------------------------------------------------|------------------------------------------------------|
| La                            | La                                           | La                                                    | La                                                   |
| Ce                            | Sm                                           | Ce                                                    | Ce                                                   |
| Pr                            | Pr                                           | Pr                                                    | Pr                                                   |
| Nd                            | Nd                                           | Nd                                                    | Nd                                                   |
| Sm                            | Ce                                           | Sm                                                    | Er                                                   |
| Tb                            | Yb                                           | Eu                                                    | Eu                                                   |
| Lu                            | Tm                                           | Gd                                                    | Tm                                                   |
| Ho                            | Gd                                           |                                                       | Yb                                                   |
| Yb                            | Eu                                           |                                                       | Ho                                                   |
| Eu                            | Er                                           | Er                                                    |                                                      |
| Er                            | Ho                                           | Yb                                                    |                                                      |
| Tm                            | Tb                                           | Lu                                                    | Lu                                                   |
| Gd                            | Lu                                           | Tm                                                    | Gd                                                   |

Figure S22  $^{13}\text{C}$  Solid-state NMR of epoxy polymer prepared with (top) and without (bottom) catalyst (see Table S2 for amounts of each components)

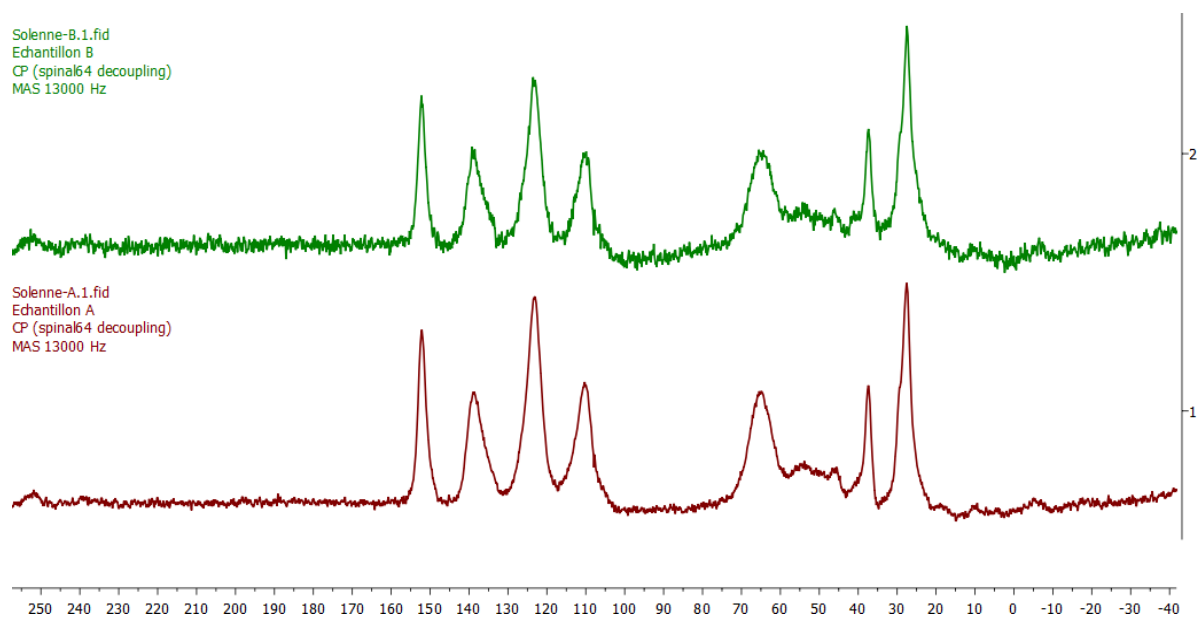

Table S15 Crystal data and data collection details for NaLa(DS)<sub>4</sub>(H<sub>2</sub>O)<sub>2</sub>

|                                                                                                                |                                                                                                                                                                                                                                               |
|----------------------------------------------------------------------------------------------------------------|-----------------------------------------------------------------------------------------------------------------------------------------------------------------------------------------------------------------------------------------------|
| Crystal data                                                                                                   |                                                                                                                                                                                                                                               |
| Chemical formula                                                                                               | <u>C<sub>48</sub>H<sub>104</sub>LaNaO<sub>18</sub>S<sub>4</sub></u>                                                                                                                                                                           |
| <i>M<sub>r</sub></i>                                                                                           | <u>1259.45</u>                                                                                                                                                                                                                                |
| Crystal system, space group                                                                                    | <u>Triclinic, <i>P</i></u>                                                                                                                                                                                                                    |
| Temperature (K)                                                                                                | <u>173</u>                                                                                                                                                                                                                                    |
| <i>a</i> , <i>b</i> , <i>c</i> (Å)                                                                             | <u>9.5203 (9), 10.7677 (10), 31.980 (3)</u>                                                                                                                                                                                                   |
| α, β, γ (°)                                                                                                    | <u>81.246 (5), 84.947 (4), 72.957 (3)</u>                                                                                                                                                                                                     |
| <i>V</i> (Å <sup>3</sup> )                                                                                     | <u>3094.6 (5)</u>                                                                                                                                                                                                                             |
| <i>Z</i>                                                                                                       | <u>2</u>                                                                                                                                                                                                                                      |
| Radiation type                                                                                                 | <u>Mo <i>K</i>α</u>                                                                                                                                                                                                                           |
| μ (mm <sup>-1</sup> )                                                                                          | <u>0.90</u>                                                                                                                                                                                                                                   |
| Crystal size (mm)                                                                                              | <u>0.54 × 0.16 × 0.03</u>                                                                                                                                                                                                                     |
| Data collection                                                                                                |                                                                                                                                                                                                                                               |
| Diffractometer                                                                                                 | <u>Apex II CCD</u>                                                                                                                                                                                                                            |
| Absorption correction                                                                                          | <u>Numerical<br/>SADABS2016/2 (Bruker,2016) was used for absorption correction. wR2(int) was 0.1058 before and 0.0911 after correction. The Ratio of minimum to maximum transmission is 0.7725. The λ/2 correction factor is Not present.</u> |
| <i>T<sub>min</sub></i> , <i>T<sub>max</sub></i>                                                                | <u>0.573, 0.742</u>                                                                                                                                                                                                                           |
| No. of measured, independent and observed [ <i>I</i> > 2σ( <i>I</i> )] reflections                             | <u>37181, 10627, 7063</u>                                                                                                                                                                                                                     |
| <i>R<sub>int</sub></i>                                                                                         | <u>0.110</u>                                                                                                                                                                                                                                  |
| (sin θ/λ) <sub>max</sub> (Å <sup>-1</sup> )                                                                    | <u>0.595</u>                                                                                                                                                                                                                                  |
| Refinement                                                                                                     |                                                                                                                                                                                                                                               |
| <i>R</i> [ <i>F</i> <sup>2</sup> > 2σ( <i>F</i> <sup>2</sup> )], <i>wR</i> ( <i>F</i> <sup>2</sup> ), <i>S</i> | <u>0.069, 0.192, 1.04</u>                                                                                                                                                                                                                     |
| No. of reflections                                                                                             | <u>10627</u>                                                                                                                                                                                                                                  |
| No. of parameters                                                                                              | <u>701</u>                                                                                                                                                                                                                                    |
| No. of restraints                                                                                              | <u>1669</u>                                                                                                                                                                                                                                   |
| H-atom treatment                                                                                               | <u>H-atom parameters constrained</u>                                                                                                                                                                                                          |
| Δρ <sub>max</sub> , Δρ <sub>min</sub> (e Å <sup>-3</sup> )                                                     | <u>2.13, -1.71</u>                                                                                                                                                                                                                            |

Computer programs: S<sub>A</sub>I<sub>N</sub>T V8.27B (Bruker, 2012), SHELXT (Sheldrick, 2015), XL (Sheldrick, 2008), Olex2 1.3 (Dolomanov *et al.*, 2009).
